# Supplementary material for: Enhancing CAR T-cell Therapy Using Fab-Based Constitutively Heterodimeric Cytokine Receptors
Source: PubMed Central journal article supplement — Cancer Immunol Res. 2023 Jun 23;11(9):1203–21. doi: 10.1158/2326-6066.CIR-22-0640 (PMC10472109; doi:10.1158/2326-6066.cir-22-0640), 2023-06-23
Supplement: cir-22-0640_supplementary_table_1_suppst1.pdf [file cir-22-0640_supplementary_table_1_suppst1.pdf]

| dFab_CCR-IL2                                     |             | 1000iu/mL rIL2                                   |             |
|--------------------------------------------------|-------------|--------------------------------------------------|-------------|
| NAME                                             | FDR q-val   | NAME                                             | FDR q-val   |
| KEGG_CELL_CYCLE                                  | 0           | KEGG_CELL_CYCLE                                  | 0           |
| KEGG_DNA_REPLICATION                             | 0           | KEGG_DNA_REPLICATION                             | 0           |
| KEGG_MISMATCH_REPAIR                             | 0           | KEGG_OOCYTE_MEIOSIS                              | 4.04E-04    |
| KEGG_P53_SIGNALING_PATHWAY                       | 0           | KEGG_MISMATCH_REPAIR                             | 5.38E-04    |
| KEGG_PROTEASOME                                  | 0           | KEGG_PROTEASOME                                  | 6.67E-04    |
| KEGG_OOCYTE_MEIOSIS                              | 3.03E-04    | KEGG_P53_SIGNALING_PATHWAY                       | 8.38E-04    |
| KEGG_STEROID_BIOSYNTHESIS                        | 7.97E-04    | KEGG_STEROID_BIOSYNTHESIS                        | 9.69E-04    |
| KEGG_ASTHMA                                      | 8.85E-04    | KEGG_HOMOLOGOUS_RECOMBINATION                    | 0.001191859 |
| KEGG_HOMOLOGOUS_RECOMBINATION                    | 9.09E-04    | KEGG_NUCLEOTIDE_EXCISION_REPAIR                  | 0.001919777 |
| KEGG_JAK_STAT_SIGNALING_PATHWAY                  | 9.96E-04    | KEGG_PYRIMIDINE_METABOLISM                       | 0.001957343 |
|                                                  |             | KEGG_PROGESTERONE_MEDIATED_OOCYTE_MATURATI<br>ON | 0.002136285 |
| KEGG_SMALL_CELL_LUNG_CANCER                      | 0.001141154 | KEGG_BIOSYNTHESIS_OF_UNSATURATED_FATTY_ACIDS     | 0.002174826 |
| KEGG_LEISHMANIA_INFECTION                        | 0.001692504 | KEGG_JAK_STAT_SIGNALING_PATHWAY                  | 0.002726728 |
| KEGG_PYRIMIDINE_METABOLISM                       | 0.001948305 |                                                  |             |
| KEGG_PROGESTERONE_MEDIATED_OOCYTE_MATURATI<br>ON | 0.002253857 | KEGG_BASE_EXCISION_REPAIR                        | 0.002921494 |
| KEGG_BIOSYNTHESIS_OF_UNSATURATED_FATTY_ACIDS     | 0.00445066  | KEGG_PENTOSE_PHOSPHATE_PATHWAY                   | 0.003146225 |
| KEGG_BLADDER_CANCER                              | 0.005318648 | KEGG_SMALL_CELL_LUNG_CANCER                      | 0.006297424 |
| KEGG_TYPE_I_DIABETES_MELLITUS                    | 0.005318836 | KEGG_CITRATE_CYCLE_TCA_CYCLE                     | 0.006397896 |
| KEGG_NUCLEOTIDE_EXCISION_REPAIR                  | 0.005539546 | KEGG_LEISHMANIA_INFECTION                        | 0.006618816 |
| KEGG_PURINE_METABOLISM                           | 0.006092347 | KEGG_PANCREATIC_CANCER                           | 0.006754974 |
| KEGG_CITRATE_CYCLE_TCA_CYCLE                     | 0.008060183 | KEGG_PURINE_METABOLISM                           | 0.007604821 |
| KEGG_PANCREATIC_CANCER                           | 0.008325363 | KEGG_FRUCTOSE_AND_MANNANOSE_METABOLISM           | 0.012156728 |
| KEGG_BASE_EXCISION_REPAIR                        | 0.009245954 | KEGG_ONE_CARBON_POOL_BY_FOLATE                   | 0.012991006 |
| KEGG_APOPTOSIS                                   | 0.010396839 | KEGG_SPLICEOSOME                                 | 0.013266745 |
| KEGG_NICOTINATE_AND_NICOTINAMIDE_METABOLISM      | 0.011831495 | KEGG_ASTHMA                                      | 0.014132495 |
| KEGG_PROSTATE_CANCER                             | 0.012157027 | KEGG_TYPE_I_DIABETES_MELLITUS                    | 0.014512756 |
| KEGG_ONE_CARBON_POOL_BY_FOLATE                   | 0.015427719 | KEGG_NICOTINATE_AND_NICOTINAMIDE_METABOLISM      | 0.014963876 |
| KEGG_ALLOGRAFT_REJECTION                         | 0.01893525  | KEGG_OXIDATIVE_PHOSPHORYLATION                   | 0.016513802 |
| KEGG_VIRAL_MYOCARDITIS                           | 0.019636557 | KEGG_PROSTATE_CANCER                             | 0.016625587 |
| KEGG_FRUCTOSE_AND_MANNANOSE_METABOLISM           | 0.020598702 | KEGG_PARKINSONS_DISEASE                          | 0.016660001 |
| KEGG_PENTOSE_PHOSPHATE_PATHWAY                   | 0.026059046 | KEGG_RNA_DEGRADATION                             | 0.01758125  |
| KEGG_RNA_DEGRADATION                             | 0.026159013 | KEGG_CYSTEINE_AND_METHIONINE_METABOLISM          | 0.019180477 |
| KEGG_CYSTEINE_AND_METHIONINE_METABOLISM          | 0.026271597 | KEGG_APOPTOSIS                                   | 0.022218142 |
| KEGG_SPLICEOSOME                                 | 0.026515286 | KEGG_BLADDER_CANCER                              | 0.023375792 |
| KEGG_PATHWAYS_IN_CANCER                          | 0.0312167   | KEGG_GALACTOSE_METABOLISM                        | 0.045779463 |
| KEGG_SELENOAMINO_ACID_METABOLISM                 | 0.03178405  | KEGG_PATHWAYS_IN_CANCER                          | 0.052701943 |
| KEGG_CHRONIC_MYELOID_LEUKEMIA                    | 0.035655078 | KEGG_GLYCOLYSIS_GLUONEOGENESIS                   | 0.053632267 |
| KEGG_NON_SMALL_CELL_LUNG_CANCER                  | 0.035900593 | KEGG_NON_SMALL_CELL_LUNG_CANCER                  | 0.056464013 |
| KEGG_AUTOIMMUNE_THYROID_DISEASE                  | 0.048180196 | KEGG_GLIOMA                                      | 0.058336943 |
| KEGG_GLIOMA                                      | 0.051803492 | KEGG_ARGININE_AND_PROLINE_METABOLISM             | 0.059872124 |
| KEGG_OXIDATIVE_PHOSPHORYLATION                   | 0.05697873  | KEGG_ALLOGRAFT_REJECTION                         | 0.09657413  |
| KEGG_ARGININE_AND_PROLINE_METABOLISM             | 0.05701588  | KEGG_CHRONIC_MYELOID_LEUKEMIA                    | 0.10420097  |
| KEGG_RIG_I LIKE RECEPTOR SIGNALING PATHWAY       | 0.059733212 | KEGG_Glutathione_Metabolism                      | 0.10698543  |
| KEGG_PARKINSONS_DISEASE                          | 0.06808032  | KEGG_STARCH_AND_SUCROSE_METABOLISM               | 0.113585986 |
| KEGG_THYROID_CANCER                              | 0.07319974  | KEGG_COLORECTAL_CANCER                           | 0.11485482  |
| KEGG_GLYCINE_SERINE_AND_THREONINE_METABOLIS<br>M | 0.07575885  | KEGG_GLYCINE_SERINE_AND_THREONINE_METABOLIS<br>M | 0.12764429  |
| KEGG_MELANOMA                                    | 0.07577219  | KEGG_SELENOAMINO_ACID_METABOLISM                 | 0.12899627  |
| KEGG_GLYCOLYSIS_GLUONEOGENESIS                   | 0.07845241  | KEGG_UBIQUITIN_MEDIATED_PROTEOLYSIS              | 0.12927614  |
| KEGG_TYPE_II_DIABETES_MELLITUS                   | 0.079340056 | KEGG_VIRAL_MYOCARDITIS                           | 0.14288495  |
| KEGG_Glutathione_Metabolism                      | 0.08831056  | KEGG_PATHOGENIC_ESCHERICHIA_COLI_INFECTION       | 0.17281201  |
| KEGG_ANTIGEN_PROCESSING_AND_PRESENTATION         | 0.09365836  | KEGG_GAP_JUNCTION                                | 0.17612697  |

### Supplementary Table S2. Top 50 up-regulated GSEA pathways.

Top 50 up-regulated GSEA pathways utilised for the generation of the Venn diagram in figure 1H. dFab\_CCR-IL2 T cells or non-transduced T cells treated with 100000 iU/mL IL2, were compared to non-transduced T cells culture in cytokine starvation.
